# Supplementary material
Source: publisher site journal article supplement (https://www.dovepress.com/article/398289)
Supplement: Supplementary file 1 [file get_supplementary_file.php]

**Supplementary Materials**

# Mettl3 mediated m6A methylation involved in Epithelial-Mesenchymal Transition by targeting SOCS3/STAT3/SNAI1 in cigarette smoking-induced COPD

Yaping Zhang1, *

Lixing Wang1, *

Furong Yan1

Meili Yang2

Hongzhi Gao1

Yimeng Zeng3

| **Primer name** | **Primer sequences** |
| --- | --- |
| Mettl3-F-5′ | GTGATCGTAGCTGAGGTTCGTTCC |
| Mettl3-R-5′ | CTCAATCTTGCGAGTGCCAGGAG |
| Mettl14-F-5′ | TAGCCGCTTGCAGGAGATCCG |
| Mettl14-R-5′ | AACACGGCACCAATGCTGTCG |
| ALKBH5-F-5′ | GCAAGGTGAAGAGCGGCATCC |
| ALKBH5-R-5′ | GTCCACCGTGTGCTCGTTGTAC |
| FTO-F-5′ | GCCGCTGCTTGTGAGACCTTC |
| FTO-R-5′ | TGCTGCTCTGCTCTTAATGTCCAC |
| SOCS3-F-5′ | GCCTCAAGACCTTCAGCTCCAAG |
| SOCS3-R-5′ | CGGCACTGAGCAGCAGGTTC |
| E-Cadherin-F-5′ | GCTCTTCCAGGAACCTCTGTGATG |
| E-Cadherin-R-5′ | AAGCGATGGCGGCATTGTAGG |
| Vimentin-F-5′ | TTGCCGTTGAAGCTGCTAACTACC |
| Vimentin-R-5′ | AATCCTGCTCTCCTCGCCTTCC |
| SNAI1-F-5′ | CCGCCTCGCTGCCAATGC |
| SNAI1-R-5′ | GCTCTGCCACCCTGGGACTC |
| MMP9-F-5′ | TCCTGGTGCTCCTGGTGCTG |
| MMP9-R-5′ | CTGCCTGTCGGTGAGATTGGTT |
| GAPDH -F-5′ | CAGGAGGCATTGCTGATGAT |
| GAPDH -R-5′ | GAAGGCTGGGGCTCATTT |

## Supplementary Table 1. Primer sequences used in RT-qPCR analysis.


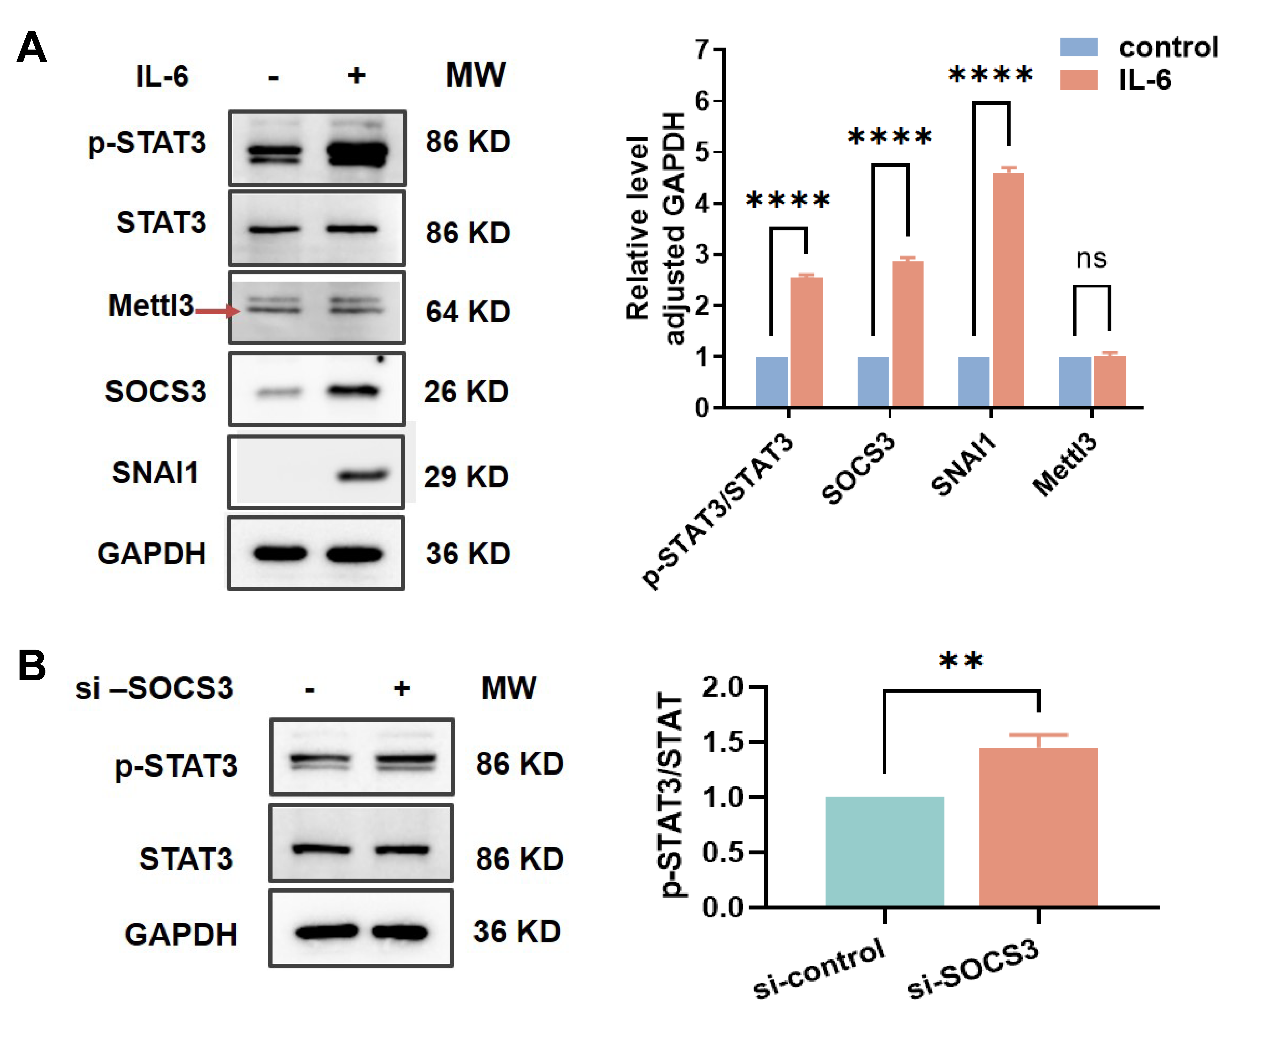


**Supplementary Figure 1 IL-6/STAT3/SOCS3 signaling involved in HBEC exposed to CSE. (A)** Western blot analysis of phosphorylation of STAT3 and the protein levels of Mettl3, SOCS3 and SNAI1 in HBEC exposed to 30 ng/ml IL-6 for 24 h. **(B)** Western blot analysis of phosphorylation of STAT3 in SOCS3 silence HBEC.**** P<0.0005, *** P<0.0005, ** P<0.005, * P<0.05, ns, not significant.





**Supplementary Figure 2** (**A**) The m6A peak abundances in SNAI1 mRNA transcript in HBEC were detected by MeRIP-seq, shown in IGV. The red peaks were IP, and the blue peaks were Input. (**B**) SNAI1 mRNA level decreased significantly in HBECs transfected with siRNA-Mettl3. **** P<0.0005.
